# Supplementary material for: Adjunctive brexpiprazole in patients with major depressive disorder and anxiety symptoms: post hoc analyses of three placebo-controlled studies
Source: PubMed Central journal article supplement — Neuropsychiatr Dis Treat. 2018 Dec 20;15:37–45. doi: 10.2147/NDT.S185815 (PMC6305164; doi:10.2147/ndt.s185815), 2018-12-20
Supplement: NDT-15-037-185815.pdf [file NDT-15-037-185815.pdf]

## **Supplement** List of independent ethics committees (IECs)/institutional review boards (IRBs)

*Supplement to: Adjunctive brexpiprazole in patients with major depressive disorder and anxiety symptoms: post hoc analyses of three placebo-controlled studies*

*Michael E Thase, Emmanuelle Weiller, Peter Zhang, Catherine Weiss, Roger S McIntyre*

### **Pyxis (NCT01360645)**

Central IRB – Canada and US

- ◆ Schulman Associates IRB (Cincinnati, OH)

Local IRBs – US

- ◆ Office of Regulatory Affairs, University of Pennsylvania (Philadelphia, PA)
- ◆ McLean Hospital IRB (Belmont, MA)
- ◆ Via Christi Hospitals Wichita, Inc. IRB (Wichita, KS)

Local IRB – Canada

- ◆ Research Ethics Board, Gatineau HSSC, Hull Hospital (Gatineau, Quebec)

Central IEC – France

- ◆ CPP Ile de France XI, Pavillon Jacques Courtois (Saint Germain en Laye)

Central IEC – Poland

- ◆ Bioethics Committee of the Regional Chamber of Physicians in Gdańsk (Gdańsk)

Central IEC – Slovakia

- ◆ Centrálna Etická komisia Košického samosprávneho kraja (Košice)

Local IECs – Slovakia

- ◆ Etická komisia Bratislavského samosprávneho kraja (Bratislava)
- ◆ Etická komisia pri PN Michalovce (Michalovce)
- ◆ Etická komisia Nitrianskeho samosprávneho kraja (Nitra)

## **Polaris (NCT01360632)**

Central IRB – Canada and US

- ◆ Schulman Associates IRB (Cincinnati, OH)

Local IRBs – US

- ◆ Dean Institutional Review Board (Middleton, WI)
- ◆ Western Institutional Review Board (Olympia, WA)
- ◆ Institutional Review Board, Rush University Medical Center (Chicago, IL)

Central IEC – Germany

- ◆ Ethikkommission bei der Ärztekammer Niedersachsen (Hannover)

Local IECs – Germany

- ◆ Ethikkommission an der Medizinischen Fakultät der Universität Greifswald (Greifswald)
- ◆ Ethikkommission der Bayerischen Landesärztekammer (München)
- ◆ Ethikkommission der Ärztekammer Westfalen-Lippe und der Medizinischen Fakultät der Westfälischen Wilhelms-Universität Münster (Münster)

Central IEC – Hungary

- ◆ Egészségügyi Tudományos Tanács Klinikai Farmakológiai Etikai Bizottsága (ETT-KFEB) (Budapest)

Central IEC – Romania

- ◆ Ministry of Public Health, National Ethics Committee for the Clinical Study of Medicines (NEC) (Bucharest)

Central IEC – Russia

- ◆ Ethics Council under Ministry of Health of the Russian Federation (Moscow)

Central IEC – Ukraine

- ◆ Central Ethics Committee of MoH of Ukraine (Kyiv)

Local IECs – Ukraine

- ◆ Ethics Committee of Kyiv City Psychoneurological Hospital #1 (Kyiv)
- ◆ Ethics Committee of Kyiv City Psychoneurological Hospital #2 (Kyiv)
- ◆ Ethics Committee of Public Medicoprohylactic Institution Chernigiv Regional Psychoneurological Hospital (Chernigiv)
- ◆ Ethics Committee of Public Healthcare Institution Kharkiv Regional Psychiatric Hospital No. 3 (Kharkiv)
- ◆ Ethics Committee of Poltava Regional Clinical Psychiatric Hospital named O.F. Maltsev (Poltava)

## **Sirius (NCT02196506)**

### Central IRB – US

- ◆ Schulman Associates IRB (Cincinnati, OH)

### Local IRB – US

- ◆ Office of Regulatory Affairs, University of Pennsylvania (Philadelphia, PA)

### Central IEC – Hungary

- ◆ Egészségügyi Tudományos Tanács Klinikai Farmakológiai Etikai Bizottsága (ETT-KFEB) (Budapest)

### Central IEC – Germany

- ◆ Ethikkommission bei der Ärztekammer Niedersachsen (Hannover)

### Local IECs – Germany

- ◆ Ethikkommission der Landesärztekammer in Hessen (Frankfurt)
- ◆ Ethikkommission der Landesärztekammer Brandenburg (Cottbus)
- ◆ Ethikkommission an der Medizinischen Fakultät der Universität Greifswald (Greifswald)
- ◆ Ethikkommission der Bayerischen Landesärztekammer (München)
- ◆ Landesamt für Gesundheit und Soziales Berlin, Geschäftsstelle der EK des Landes Berlin (Berlin)
- ◆ Ethikkommission der Albert-Ludwigs-Universität Freiburg (Freiburg)
- ◆ Ethikkommission der Medizinischen Fakultät der Heinrich-Heine-Universität Düsseldorf (Düsseldorf)

### Central IEC – Poland

- ◆ Komisja Bioetyczna Przy Śląskiej Izbie Lekarskiej (Katowice)

### Central IEC – Slovakia

- ◆ Centrálna Etická komisia Košického samosprávneho kraja (Košice)

### Local IECs – Slovakia

- ◆ Etická komisia Bratislavského samosprávneho kraja (Bratislava)
- ◆ Etická komisia pri LNsP MUDr. Ivana Stodolu Liptovský Mikuláš (Liptovský Mikuláš)
